# Supplementary material for: Alkaline earth cation-mediated photoluminescent complexes of thioflavin T with twisted cucurbit[14]uril
Source: Royal Society of Chemistry journal article supplement (doi:10.1039/c7nj04115b), 2018-01-01
Supplement: c7nj04115b1.pdf [file c7nj04115b1.pdf]

## Alkaline Earth Caions-Mediated Photoluminescent Materials of

### Thioflavin with Twisted Cucurbit[14]uril

Cheng-Hui Wang,<sup>ab</sup> Qing Tang,<sup>c</sup> Jing Zhang,<sup>b</sup> Yu-Qing Yao,<sup>b</sup> Xin Xiao,<sup>b</sup> Ying Huang<sup>\*ab</sup> and Zhu Tao<sup>\*b</sup>

<sup>a</sup>The Engineering and Research Center for Southwest Bio-Pharmaceutical Resources of the National Education Ministry of China, Guizhou University, Guiyang 550025, China

<sup>b</sup>Key Laboratory of Macrocyclic and Supramolecular Chemistry of Guizhou Province, Guizhou University, Guiyang 550025, China

<sup>c</sup>College of Tobacco of Guizhou University, Guizhou University, Guiyang 550025, China

## Experimental

### 1.1. Materials.

tQ[14] was synthesized according to the procedure developed in our laboratory and characterized by <sup>1</sup>H NMR spectrometry. Thioflavin T (ThT) was obtained from Sigma–Aldrich (Shanghai, China); perchlorate salts and nitrate salts were obtained from Aladdin (Shanghai, China). All reagents were of analytical reagent grade and were used without further purification. Doubly-distilled water was used throughout.

### 1.2. Measurement of absorption and fluorescence spectra.

All UV/Vis spectra were recorded on an Agilent 8453 spectrophotometer (Agilent Technologies, Santa Clara, CA, USA) from solutions in 1 cm quartz cells. Fluorescence emission spectra were recorded on a VARIAN Cary Eclipse spectrofluorometer (Varian, Inc., Palo Alto, CA, USA). The fluorescence spectra were obtained by excitation at 414 nm with 5 nm emission and excitation bandwidths. Stock solutions of tQ[14] ( $2 \times 10^{-3}$  mol L<sup>-1</sup>), ThT ( $1 \times 10^{-3}$  mol L<sup>-1</sup>), and M<sup>n+</sup> (1 mol L<sup>-1</sup>) were prepared in doubly-distilled water. Working solutions were prepared by diluting the stock solutions to the required concentrations.

Aqueous solutions of ThT ( $2.00 \times 10^{-5}$  mol L<sup>-1</sup>) were prepared by diluting the stock solutions. For the absorption and fluorescence spectra, increasing concentrations (0– $30 \times 10^{-5}$  mol L<sup>-1</sup>) of tQ[14] solution were added to the free ThT. The excitation and maximum emission wavelengths ( $\lambda_{\text{ex}}/\lambda_{\text{em}}$ ) were 414 nm/491 nm for the complex tQ[14]–ThT with 5 nm emission and excitation bandwidths.

Aqueous solutions of tQ[14]–ThT complex (ThT:  $2.00 \times 10^{-5}$  mol L<sup>-1</sup>) were prepared for characterization by fluorescence emission spectroscopy. To obtain fluorescence spectra, quantitative concentration (20 mM) of metal ion solutions (Mg<sup>2+</sup>, Ca<sup>2+</sup>, Sr<sup>2+</sup>, Ba<sup>2+</sup>) were added to the tQ[14]–ThT complex. Fluorescence spectra were obtained by excitation at 414 nm with 5 nm emission and excitation bandwidths and the emission intensity was monitored at 390–750 nm at room temperature. The maximum emission wavelength was  $\lambda_{\text{em}}=491$  nm for the complex of tQ[14]–ThT. For each experiment, three replicate measurements were made.

### 1.3. <sup>1</sup>H NMR measurements.

<sup>1</sup>H NMR spectra were recorded at 25°C on a WNMRI-500 MHz NMR spectrometer (Wuhan Institute of Physics and Mathematics, Chinese Academy of Sciences). D<sub>2</sub>O was used as a field-frequency lock and the observed chemical shifts are reported in parts per million (ppm) relative to that of the internal standard (TMS at 0.0 ppm).

### 1.4 Isothermal titration calorimetry (ITC) measurements

Thermodynamic parameters and binding constants (*K*) for the tQ[14]/ThT complex were determined by titration calorimetry using a Nano ITC instrument (TA, USA). All solutions were prepared in doubly distilled water and degassed prior to the titration experiments. The heat evolved was recorded at 298.15 K. The heat of dilution was corrected for by injecting the guest solution (free guest) into the aqueous solution and subtracting the values from the corresponding values obtained for the host–guest titration. Computer simulations (curve fitting) were performed using the Nano ITC analytical software. For ThT, the concentration of tQ[14] in the sample cell (1.3 mL) was  $1 \times 10^{-4}$  mol/L. A typical ITC titration was carried out by titrating the ThT solution ( $1 \times 10^{-3}$  mol/L, 5  $\mu$ L aliquots, at 200 s intervals) into a tQ[14] solution. For the remaining 4 metals (containing Mg<sup>2+</sup>, Ca<sup>2+</sup>, Sr<sup>2+</sup>, Ba<sup>2+</sup>), the concentration of tQ[14] in the sample cell (1.3 mL) was  $1 \times 10^{-4}$  mol/L, and the concentration of ThT in the sample cell (1.3 mL) was  $1 \times 10^{-4}$  mol/L. The ITC titrations were carried out by titrating metals solution ( $2 \times 10^{-3}$  mol/L, 10

μL aliquots, at 250 s intervals) into the tQ[14] solution, respectively.

### **1.5 DLS measurements**

The sample solution for the DLS measurements was prepared by filtering the solution through a 450 nm millipore filter into a clean scintillation vial. It is worth noting that the aqueous solution of either tQ[14] or ThT was respectively prepared and then took the DLS measurements. Then both solutions were mixed together and the same DLS measurements were carried out. All the DLS measurements were performed at the scattering angle of 90° on a MGL-III-532nm-200mW-17061018 (Brookhaven Instruments) 25°C.

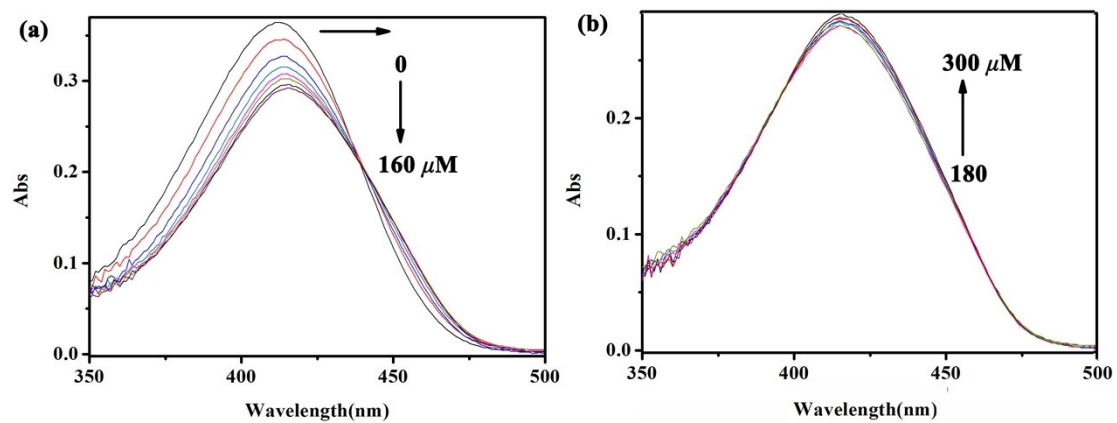

**Fig . S1.** Absorption spectra of ThT (20  $\mu\text{M}$ ) with increasing amount of *t*Q[14] from (a) 0, 20, 40, 60, 80, 100, 120, 140, 160, and (b) 180, 200, 220, 240, 260, 280, 300  $\mu\text{M}$  in aqueous solutions, respectively.

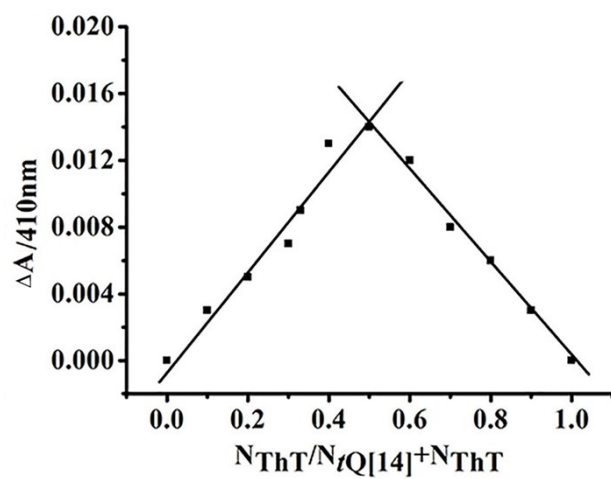

**Fig . S2** Job plot for the formation of ThT/tQ[14] complex in water ( $N_{\text{tQ[14]}} + N_{\text{ThT}} = 2.0 \times 10^{-4}$  mol/L) with a cuvette with a light path of 1 mm.

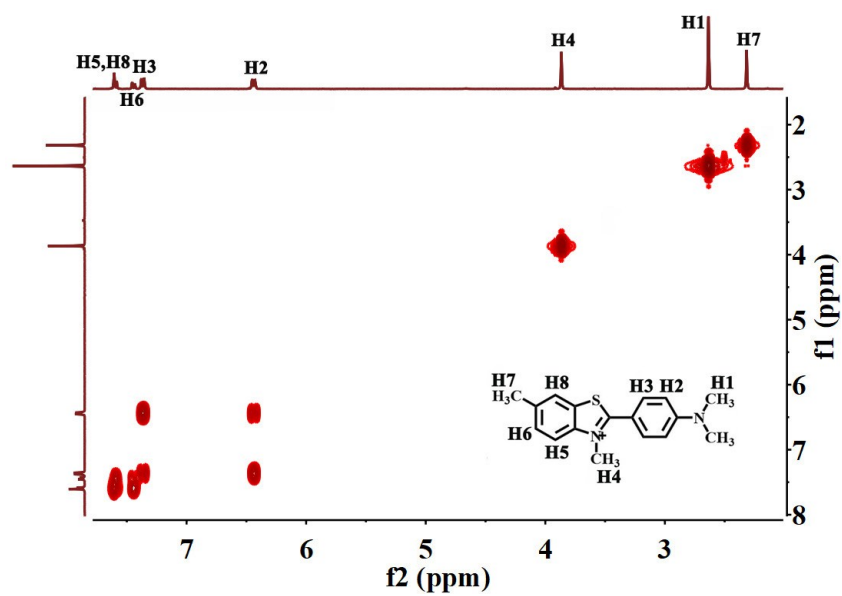

Fig. S3 COSY spectrum of ThT in D<sub>2</sub>O

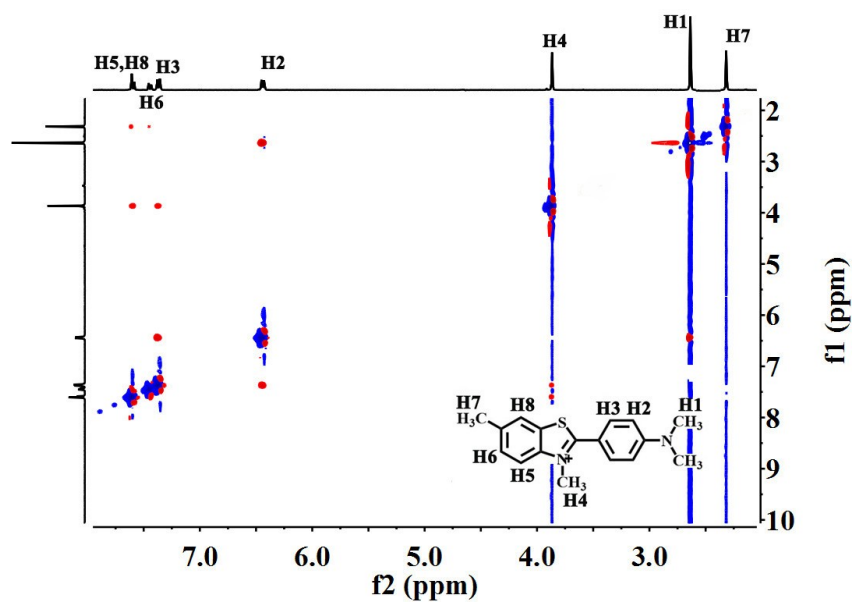

Fig. S4 ROSEY spectrum of ThT in D<sub>2</sub>O

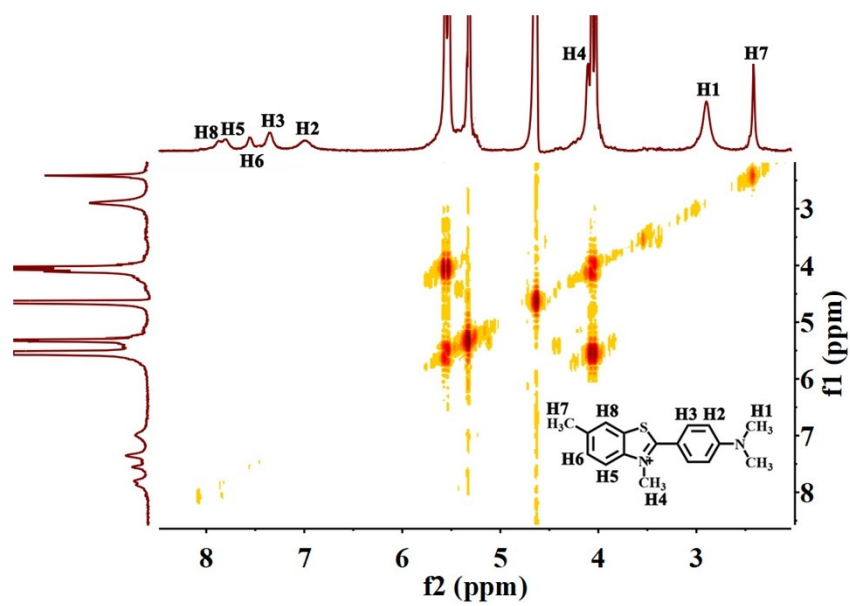

**Fig. S5** COSY 2D spectrum of ThT/*t*Q[14] (1:1) in D<sub>2</sub>O

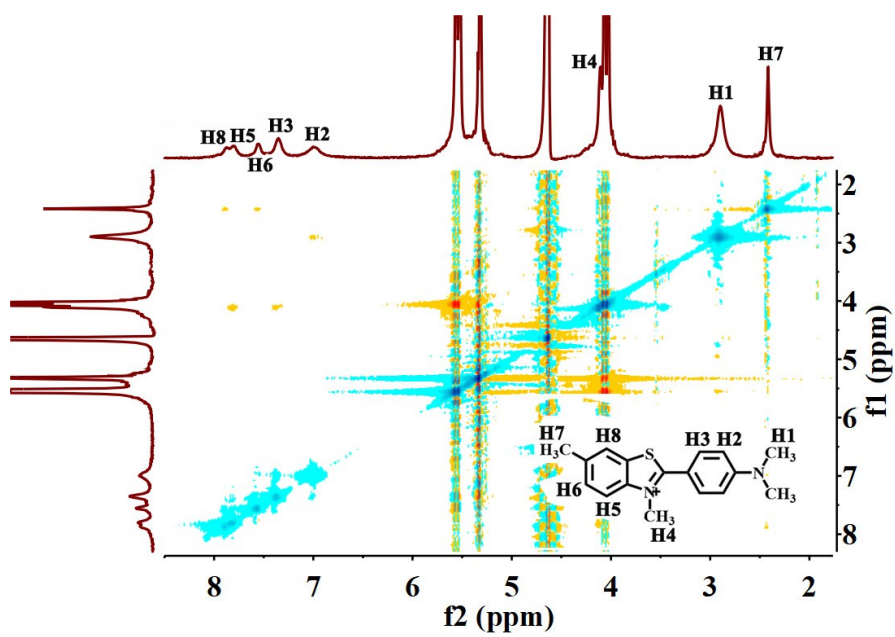

**Fig. S6** ROSEY 2D spectrum of ThT/*t*Q[14] (1:1) in D<sub>2</sub>O

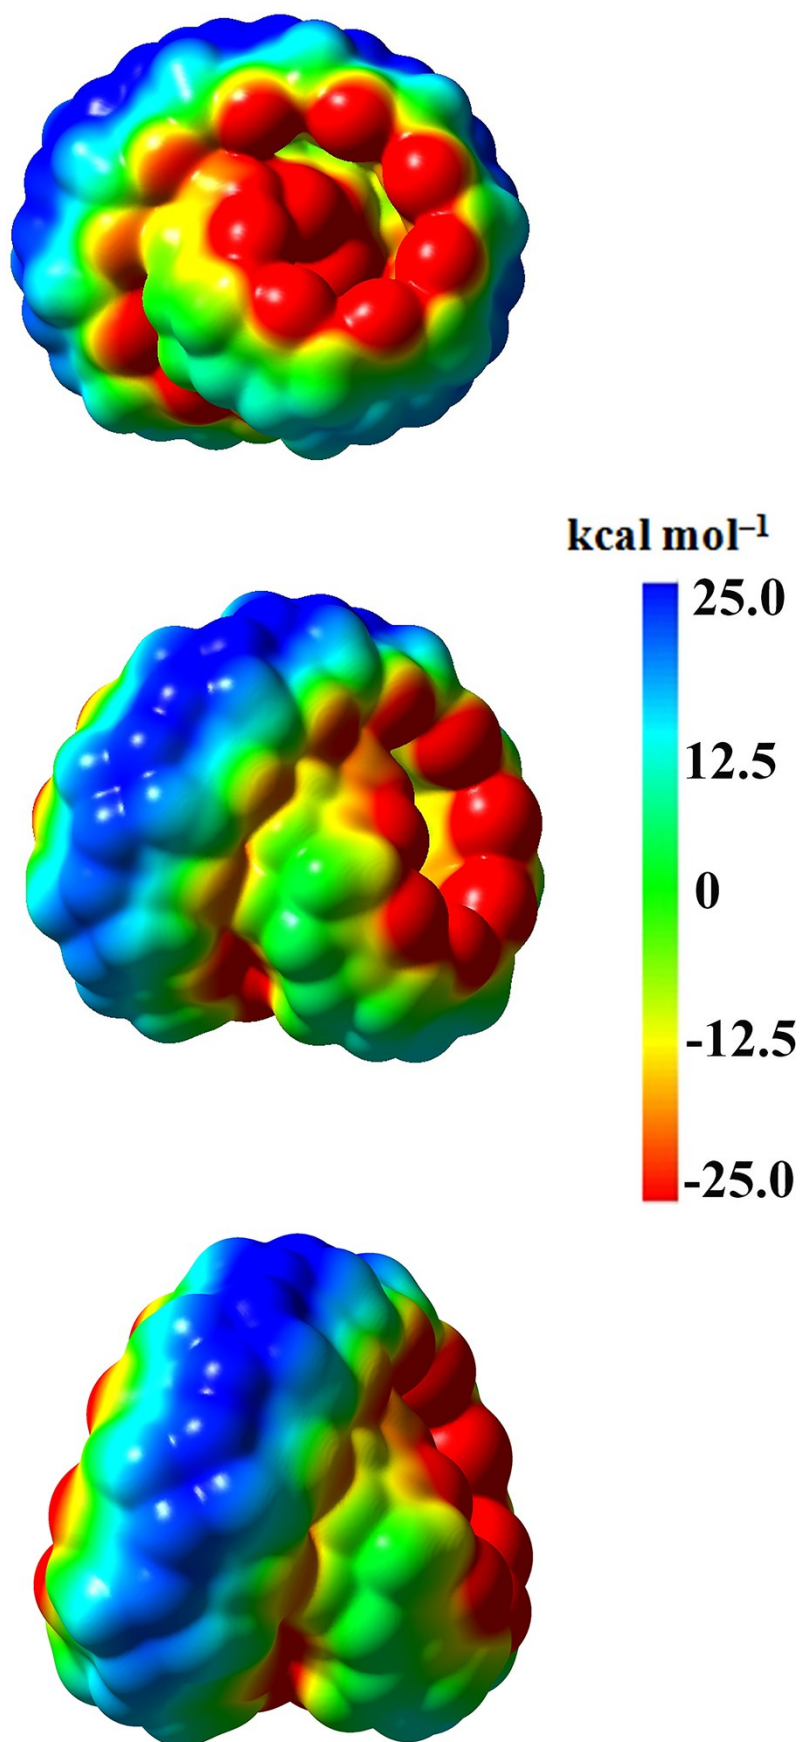

**Fig. S7** Electrostatic potential maps (ESPs) for *t*Q[14]. ESPs are mapped on electron density isosurfaces (0.001 e/au<sup>3</sup>) for *t*Q[14] at the B3LYP/6-311G (d, p) level of theory with Gaussian09.

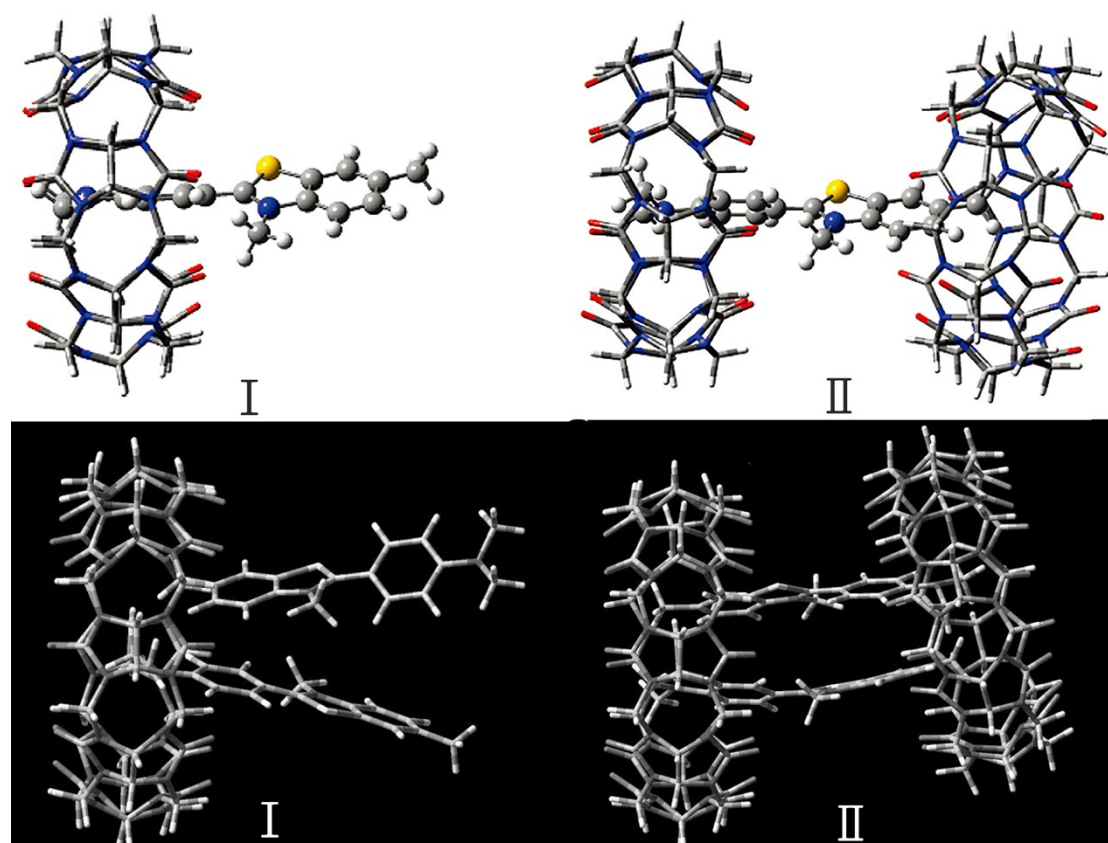

**Fig. S8** Computationally optimized structures for (top) Q[7]-ThT system in 1:1 (I) and 2:1 (II) stoichiometries; (bottom) Q[8]-ThT system in 1:2 (I) and 2:2 (II) stoichiometries.



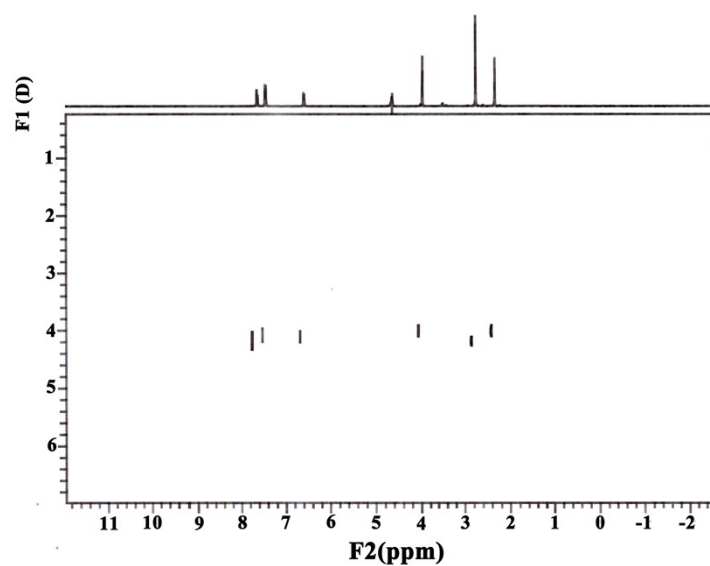

**Fig. S9** DOSY NMR spectrum of ThT in D<sub>2</sub>O

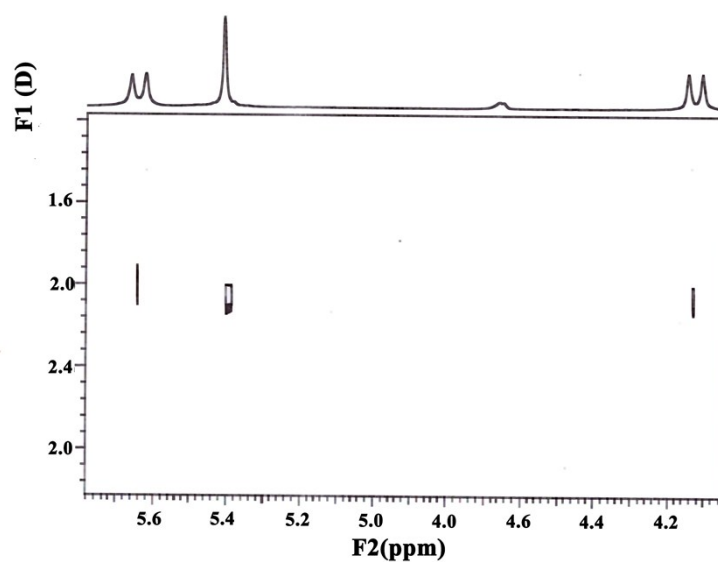

**Fig. S10** DOSY NMR spectrum of *t*Q[14] in D<sub>2</sub>O

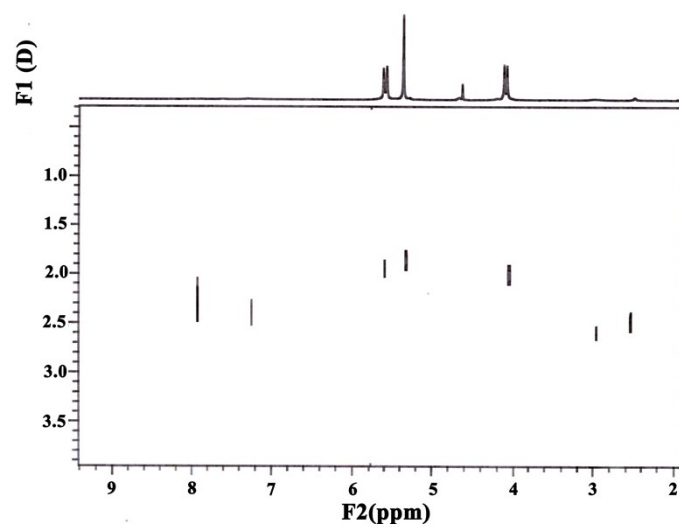

**Fig. S11** DOSY NMR spectrum of ThT/*t*Q[14] (1:1) in D<sub>2</sub>O

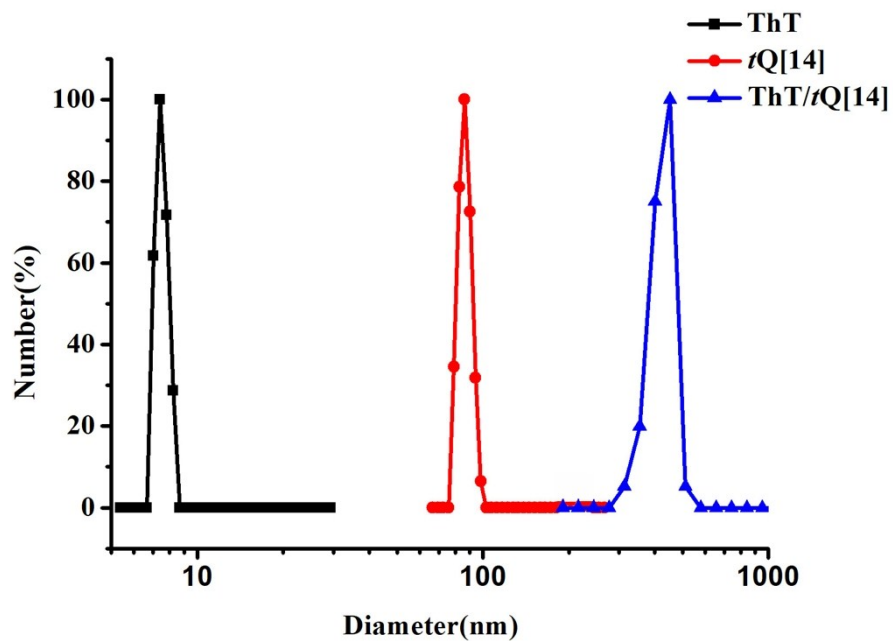

**Fig. S12** DLS results of the aqueous solution of ThT ( $C_{\text{ThT}} = 1.0 \times 10^{-3}$  mol/L), tQ[14] ( $C_{\text{tQ[14]}} = 1.0 \times 10^{-3}$  mol/L), ThT/tQ[14] (1:1,  $C_{\text{ThT}} = C_{\text{tQ[14]}} = 1.0 \times 10^{-3}$  mol/L).

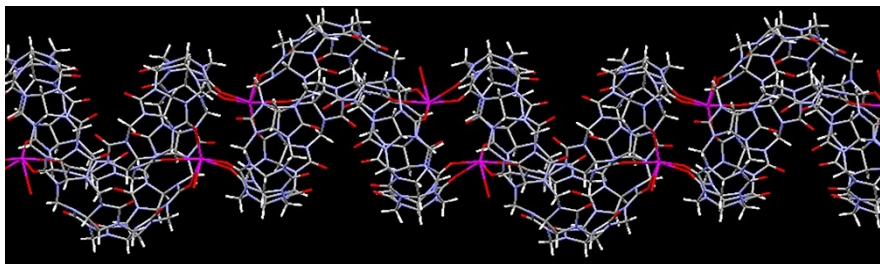

Linear  $tQ[14]/Sr^{2+}$ -based coordination polymer

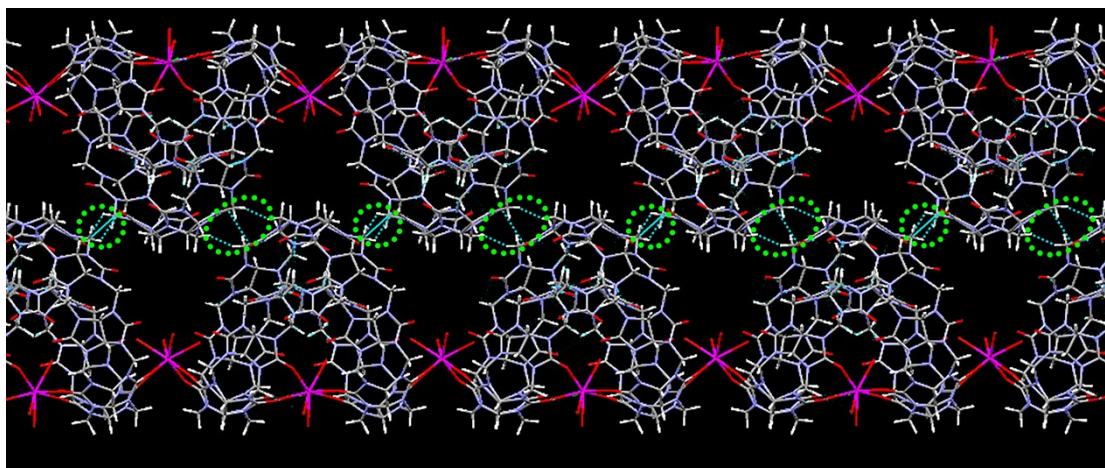

Interaction of  $tQ[14]/Eu^{3+}$ -based coordination polymers through the outer surface interaction of  $Q[n]$ s

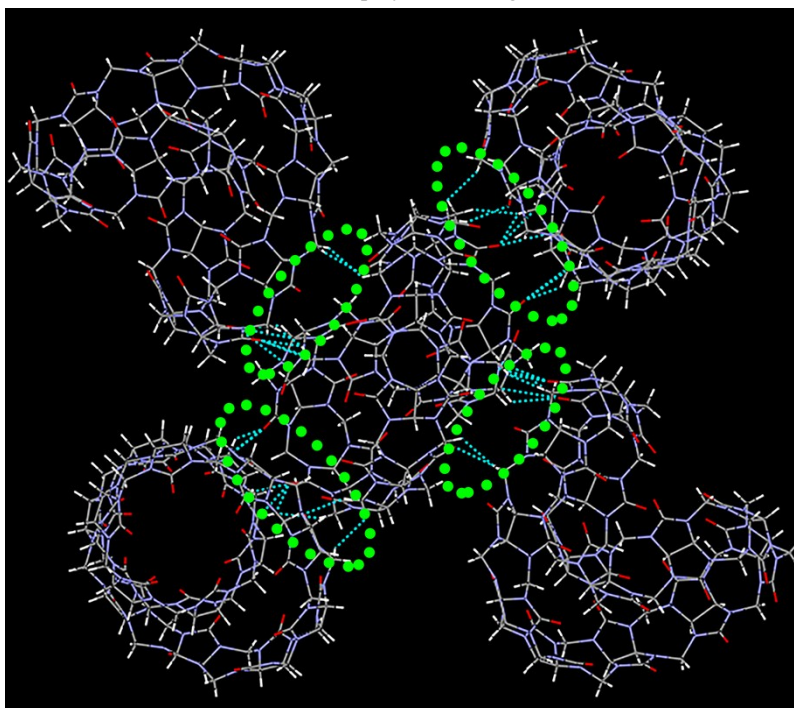

Interaction between  $tQ[14]$  molecules in various manners through the outer surface interaction of  $Q[n]$ s

**Fig. S13** (top) a  $tQ[14]$ -based chain linked by  $Sr^{2+}$  metal ions; (middle and bottom) interaction between  $tQ[14]$  molecules in different manner through the outer surface interaction of  $Q[n]$ s.

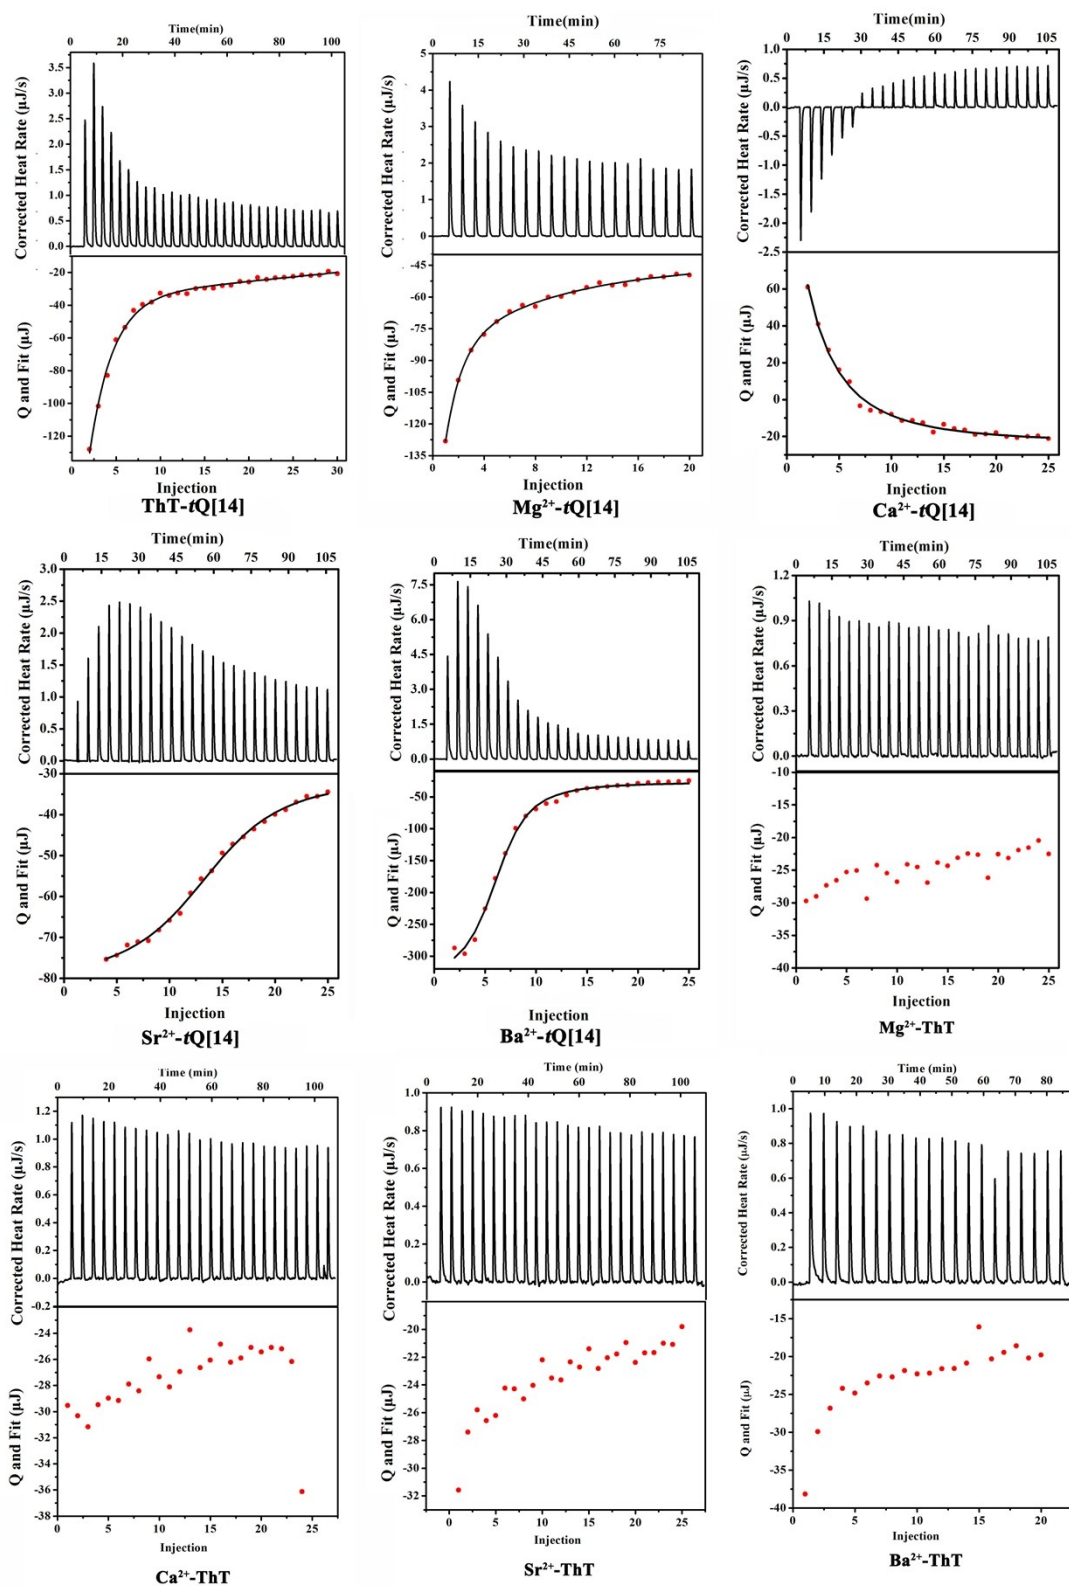

**Fig. S14** ITC profiles of interaction of *t*Q[14] with ThT and Mg<sup>2+</sup>, Ca<sup>2+</sup>, Sr<sup>2+</sup>, Ba<sup>2+</sup> metal ions, and ThT with Mg<sup>2+</sup>, Ca<sup>2+</sup>, Sr<sup>2+</sup>, Ba<sup>2+</sup> metal ions respectively, in aqueous solution at 25°C

**Table S1.** Binding constants  $K_a$  ( $M^{-1}$ ) and thermodynamic parameters  $\Delta H$  and  $T\Delta S$  (kJ/mol) for complex formation of ThT and the selected 4 metal ions with the twisted cucurbit[14]uril in aqueous solution at 25°C.

| Metal                             | $K_a(M^{-1})$      | $\Delta H$ (kJ/mol) | $T\Delta S$ (kJ/mol) |
|-----------------------------------|--------------------|---------------------|----------------------|
| ThT- <i>t</i> Q[14]               | $1.06 \times 10^5$ | -57.28              | 28.59                |
| Mg <sup>2+</sup> - <i>t</i> Q[14] | $6.44 \times 10^3$ | -43.36              | -21.62               |
| Ca <sup>2+</sup> - <i>t</i> Q[14] | $1.05 \times 10^4$ | 75.53               | 98.47                |
| Sr <sup>2+</sup> - <i>t</i> Q[14] | $3.86 \times 10^4$ | -2.52               | 23.66                |
| Ba <sup>2+</sup> - <i>t</i> Q[14] | $4.33 \times 10^5$ | -71.43              | -39.26               |
| Mg <sup>2+</sup> - ThT            | —                  | —                   | —                    |
| Ca <sup>2+</sup> - ThT            | —                  | —                   | —                    |
| Sr <sup>2+</sup> - ThT            | —                  | —                   | —                    |
| Ba <sup>2+</sup> - ThT            | —                  | —                   | —                    |

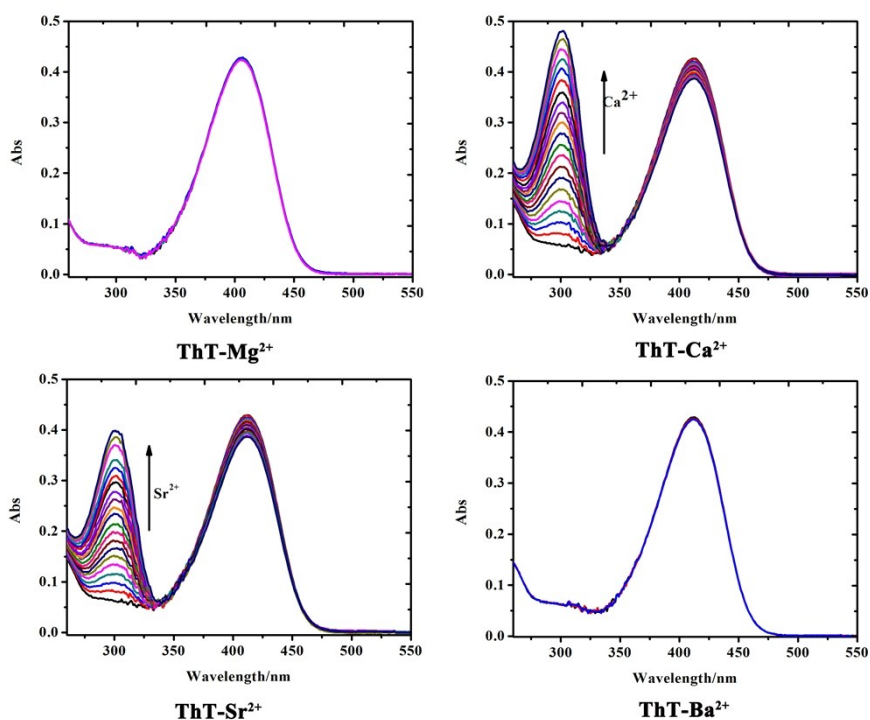

**Fig. S15** Absorption spectra of ThT (20  $\mu M$ ) in the presence of different concentrations of in the presence of 1000 equiv. of various metal ions.

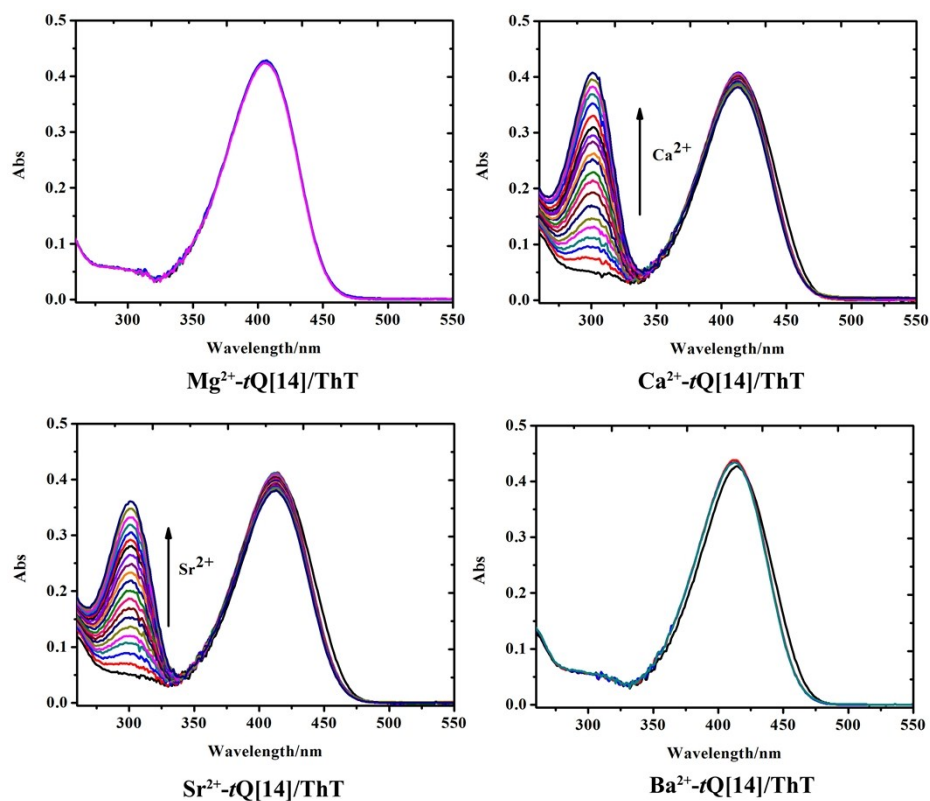

**Fig. S16** Absorption spectra of *t*Q[14]/ThT (20  $\mu$ M) in the presence of different concentrations of in the presence of 1000 equiv. of various metal ions.



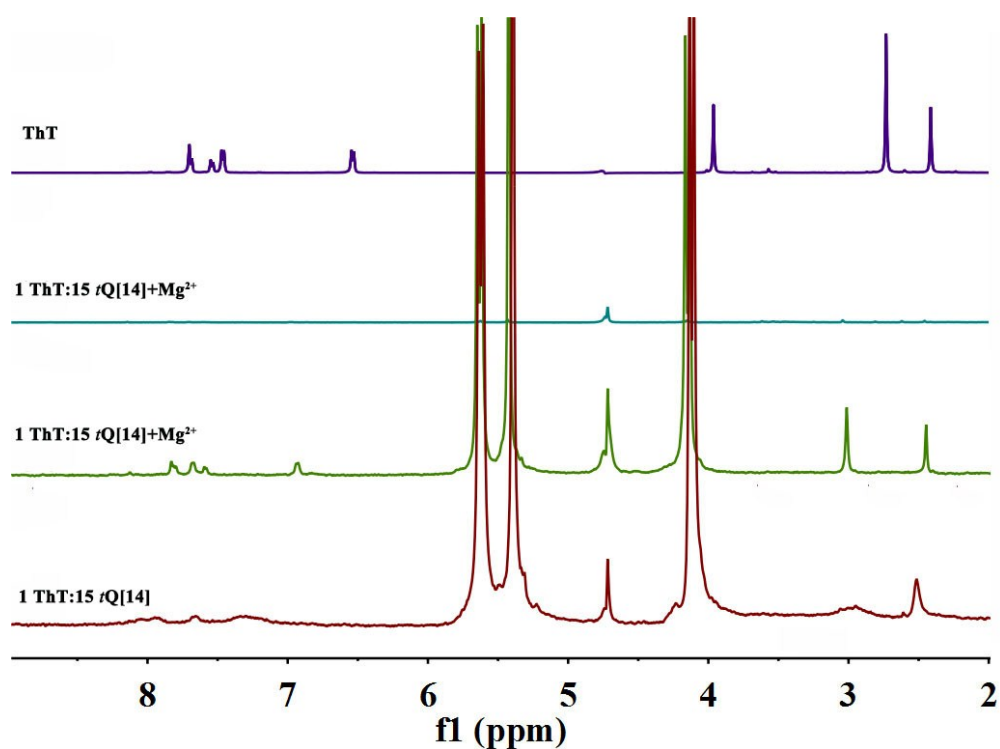

**Fig. S17** Titration <sup>1</sup>H NMR spectra (500 MHz, D<sub>2</sub>O) of *t*Q[14]/ThT with increase of Mg<sup>2+</sup> compared to the free ThT at D<sub>2</sub>O at 25°C.

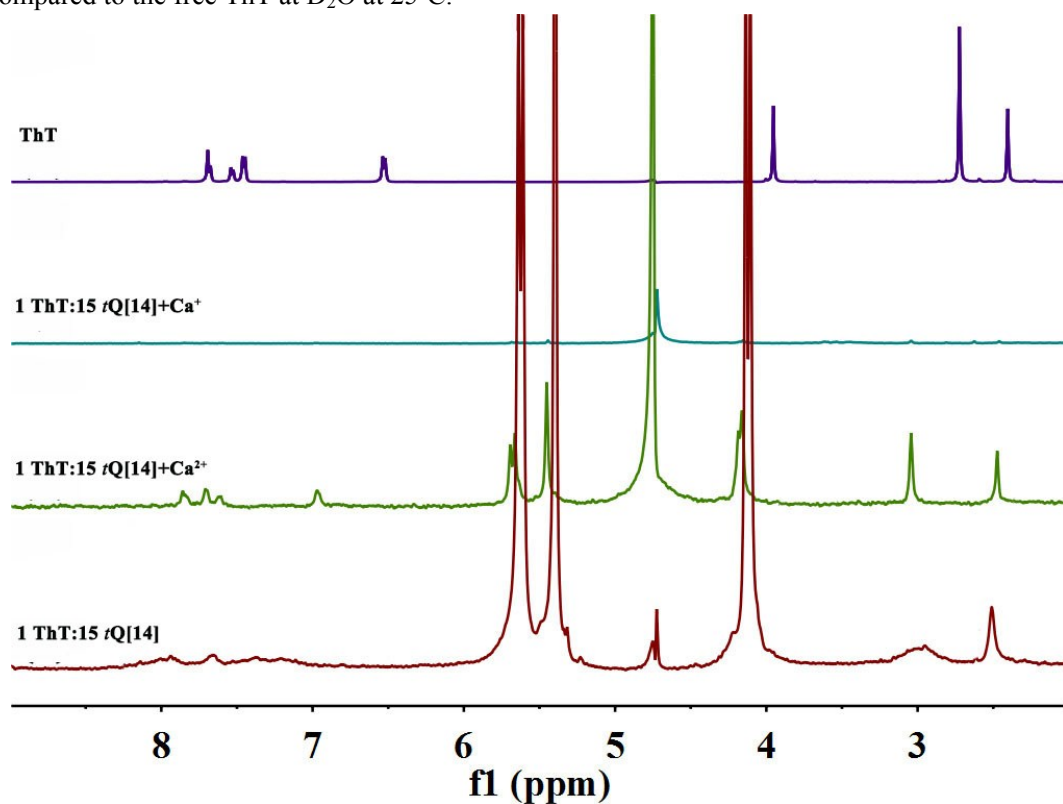

**Fig.S18** Titration <sup>1</sup>H NMR spectra (500 MHz, D<sub>2</sub>O) of *t*Q[14]/ThT with increase of Ca<sup>2+</sup> compared to the free ThT at D<sub>2</sub>O at 25°C.

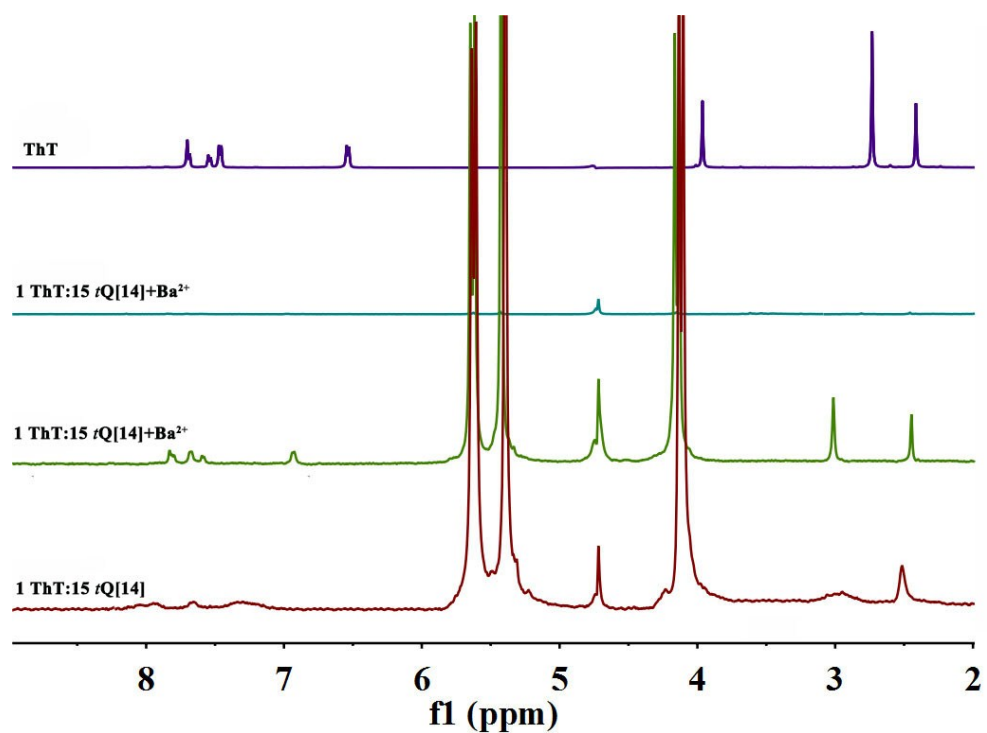

**Fig. S19** Titration <sup>1</sup>H NMR spectra (500 MHz, D<sub>2</sub>O) of *t*Q[14]/ThT with increase of Ba<sup>2+</sup> compared to the free ThT at D<sub>2</sub>O at 25°C.

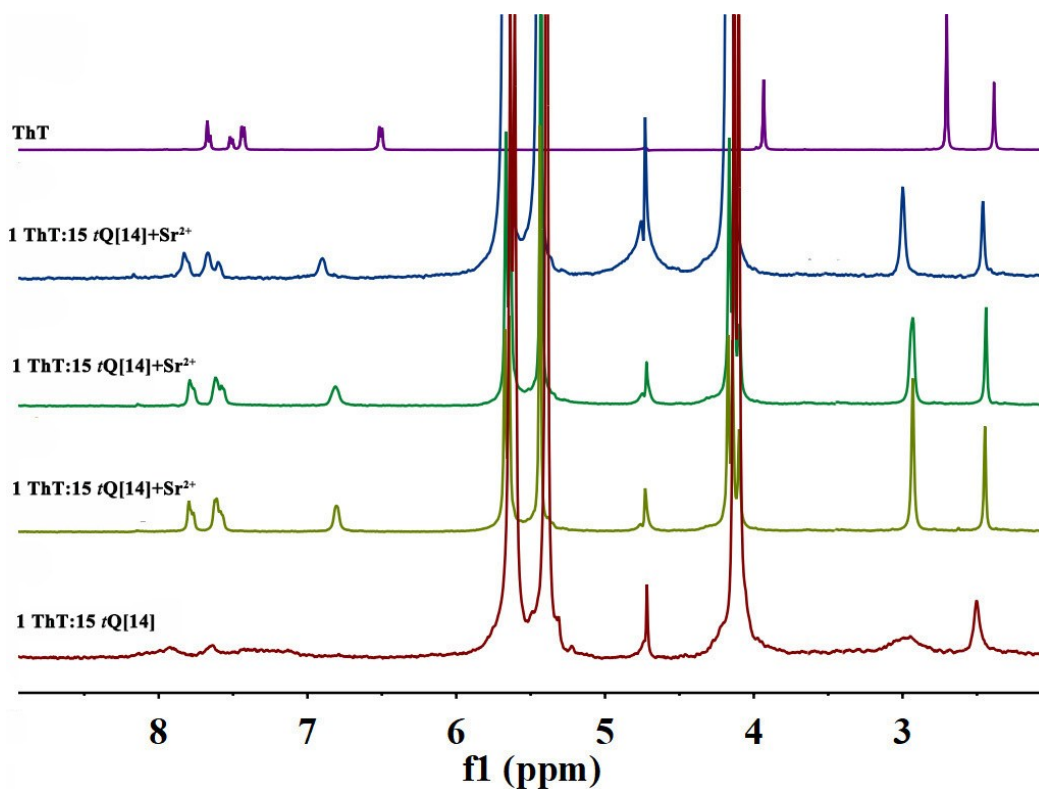

**Figure S20.** Titration <sup>1</sup>H NMR spectra (500 MHz, D<sub>2</sub>O) of *t*Q[14]/ThT with increase of Sr<sup>2+</sup> compared to the free ThT at D<sub>2</sub>O at 25°C.
